# Supplementary material
Source: publisher site journal article supplement (https://www.dovepress.com/article/490442)
Supplement: Supplementary file 1 [file get_supplementary_file.php]

**Appendix**

**Table 1S.** Describe the transformation in detail, e.g. in a table using the information below.

| Clinical thresholds | VAS intensity | VAS relief | VAS quality of life | Likert Pain intensity | Likert Pain relief | ED visits+ Hospital  admission due to Pain | Number AEs | Medication change |
| --- | --- | --- | --- | --- | --- | --- | --- | --- |
| Negative | >70 mm | <40 mm | <40 mm | 4 | 0-1 | Yes + Yes | >5 | Yes |
| Positive | <40 mm | >70 mm | >70 mm | 0-1 | 4 | No +No | 0-1 | No |

**Table 2S.** Descriptive analysis of the included variables (extreme definition, from the PSG) for the 3 cluster classes respectively 3 cut-off groups expressed in percentage (%).

| Answer | Positive | Moderate | Negative |
| --- | --- | --- | --- |
| Likert Pain Intensity (scores) | 0 | 1 | 2 |
| Cluster class 0 | 94 | 6 | 0 |
| Cut-off 0 | 81 | 16 | 3 |
| Cluster class 1 | 2 | 62 | 36 |
| Cut-off 1 | 15 | 55 | 30 |
| Cluster class 2 | 0 | 0 | 100 |
| Cut-off 2 | 0 | 5 | 95 |
| Likert Pain Relief (scores) | 0 | 1 | 2 |
| Cluster class 0 | 57 | 18 | 25 |
| Cut-off 0 | 76 | 22 | 2 |
| Cluster class 1 | 13 | 61 | 26 |
| Cut-off 1 | 12 | 55 | 34 |
| Cluster class 2 | 0 | 0 | 100 |
| Cut-off 2 | 0 | 9 | 91 |
| AEs since the last consultation (number) | 0 | 1 | 2 |
| Cluster class 0 | 16 | 52 | 32 |
| Cut-off 0 | 27 | 55 | 18 |
| Cluster class 1 | 15 | 40 | 45 |
| Cut-off 1 | 18 | 40 | 43 |
| Cluster class 2 | 9 | 38 | 52 |
| Cut-off 2 | 2 | 38 | 59 |
| Emergency department visit | 0 |  | 2 |
| Cluster class 0 | 87 |  | 13 |
| Cut-off 0 | 82 |  | 18 |
| Cluster class 1 | 80 |  | 20 |
| Cut-off 1 | 86 |  | 14 |
| Cluster class 2 | 80 |  | 20 |
| Cut-off 2 | 76 |  | 24 |
| Quality of Life (VAS QoL, mm) | 0 | 1 | 2 |
| Cluster class 0 | 34 | 49 | 17 |
| Cut-off 0 | 48 | 46 | 6 |
| Cluster class 1 | 7 | 63 | 30 |
| Cut-off 1 | 6 | 72 | 22 |
| Cluster class 2 | 0 | 52 | 48 |
| Cut-off 2 | 0 | 42 | 58 |

**Table 3S.** Clinical and Pharmacological variables according to patients’ clusters.

| Variable n (%) | Cluster 0 (n=40) | Cluster 1 (n=40) | Cluster 2 (n=40) | P-value |
| --- | --- | --- | --- | --- |
| Clinical Status | | | | |
| Pain intensity  Basal | (n=16)  48 ± 24 | (n=11)  60 ± 16 | (n=7)  80 ± 15 | 0.006 |
| Final | (n=22)  40 ± 25 | (n=25)  61 ± 22 | (n=23)  69 ± 17 | <0.0001 |
| Pain relief  Basal | (n=13)  38 ± 35 | (n=4)  37 ± 25 | (n=7)  18 ± 20 | 0.386 |
| Final | (n=19)  44 ± 24 | (n=20)  44 ± 24 | (n=19)  29 ± 28 | 0.145 |
| Quality of life  Basal | (n=14)  55 ± 20 | (n=8)  48 ± 13 | (n=7)  22 ± 23 | 0.004 |
| Final | (n=22)  49 ± 21 | (n=20)  44 ± 18 | (n=18)  37 ± 23 | 0.163 |
| Drug Management | | | | |
| Analgesic titration | 15 (37) | 18 (45) | 14 (35) | >0.05 |
| Coadjuvant Coprescription | 23 (58) | 22 (55) | 28 (70) | >0.05 |
| Opioid rotation | 11 (27) | 7 (17) | 9 (22) | >0.05 |
| Opioid withdrawal/reduction | 8 (20) | 9 (22) | 9 (22) | >0.05 |
| Analgesic technique | 3 (11) | 6 (21) | 6 (24) | >0.05 |
| Monitoring (follow up) | | | | |
| Intensive | 6 (24) | 15 (37) | 8 (20) | <0.05 |
| Pain Unit (PU) | 18 (45) | 14 (35) | 14 (35) | P>0.05 |
| PU/Pharmacology | 21 (52) | 23 (57) | 20 (50) | 0.130 |
| Primary care | 1 (2.5) | 3 (7.5) | 0 (0) | 0.163 |
| Other specialties | 5 (20) | 3 (7.5) | 1 (2.5) | 0.236 |
